# Supplementary material for: Immunogenic cell death-related biomarkers in heart failure probed by transcriptome and single-cell sequencing
Source: Frontiers journal article supplement (doi:10.3389/fimmu.2025.1560903), 2025-06-24
Supplement: Table_1.xlsx [file Table_1.xlsx]

## Sheet: Sheet1
ICD-related gene
ENTPD1
NT5E
CALR
HMGB1
HSP90AA1
ATG5
BAX
CASP8
PDIA3
EIF2AK3
PIK3CA
CXCR3
IFNA1
IFNB1
IL10
IL6
TNF
CASP1
IL1R1
IL1B
NLRP3
P2RX7
LY96
MYD88
TLR4
CD4
CD8A
CD8B
FOXP3
IFNG
IFNGR1
IL17A
IL17RA
PRF1
